# Supplementary material for: Graphene Oxide–Silver Nanoparticles Nanocomposite Stimulates Differentiation in Human Neuroblastoma Cancer Cells (SH-SY5Y)
Source: PubMed Central journal article supplement (PMC5751152; doi:10.3390/ijms18122549), 2017-11-28
Supplement: ijms-18-02549-s001.pdf [file ijms-18-02549-s001.pdf]

# Graphene Oxide–Silver Nanoparticles Nanocomposite Stimulates Differentiation in Human Neuroblastoma Cancer Cells (SH-SY5Y)

Sangiliyandi Gurunathan \* and Jin-Hoi Kim \*

Department of Stem Cell and Regenerative Biotechnology, Konkuk University, Seoul 05029, Korea

\* Correspondence: gsangiliyandi@yahoo.com (S.G.); jhkim541@konkuk.ac.kr (J.-H.K.);

Tel.: +82-2-450-0581 (S.G.); +82-2-450-3687 (J.-H.K.)

**Table S1**

| Gene         | Primer                      |
|--------------|-----------------------------|
| MAP2         | F:CATGGGTCACAGGGCACCTATTC   |
|              | R:GGTGGAGAAGGAGGCAGATTAGCTG |
| NFASC        | F:TCCTGGGCAAAGCTGAAAAC      |
|              | R:AGACGGTGAGTTTCAGGGAG      |
| PRKCA        | F:TATCGCCCCAGAGATAATCG      |
|              | R:CCTTGGACAAGGATTTTGGA      |
| NEUN         | F:CATGGGTCACAGGGCACCTATTC   |
|              | R:GGTGGAGAAGGAGGCAGATTAGCTG |
| GAP-43       | F:AGAGGAACCTGAGGCTGACC      |
|              | R:GCTAGTGGGTGGGAAAGGAC      |
| NEUROGENIN-1 | F:GACCCTGTTTTCTCCTTCCC      |
|              | R:CCATCTATTGCCTGCTGACTAG    |
| DRD-2        | F:GTCATGATCTCCATCGTCTGG     |
|              | R:AATGAAGGGCACGTAGAAGG      |
| NRP1         | F:GAAGCACCGAGAGAACAAGG      |
|              | R:GTTGCCCTCAAAGACTTCG       |
| NSE          | F:CCCAGAACTTCCCTGATTGA      |

|                     |                         |
|---------------------|-------------------------|
|                     | R:AAGTGGAAAGACACGTGGGAC |
| ALPL                | F:GCTGAACAGGAACAACGTGA  |
|                     | R:AGACTGCGCCTGGTA       |
| NPY                 | F:GCTGCGACACTACATCAACC  |
|                     | R:CACCACATTGCAGGGTCTTC  |
| TAU                 | F:AAGGTGACCTCCAAGTGTGG  |
|                     | R:TATTGTCCAGGGACCCAATC  |
| LAMININ B1          | F:ACAACACCAAAGGCCTGAAC  |
|                     | R:TGCCAGTAGCCAGGAAGACT  |
| COLLAGENASE TYPE IV | F:AAAGGGAGAAAGAGGCTTGC  |
|                     | R:CCTTTGTACCGTTGCATCCT  |

**Table S2**

| Gene   | Primer                                 |
|--------|----------------------------------------|
| REX1   | F:ACTGGTACCTCGGATTTCAAATGGAGAGGTCCTGC  |
|        | R:AATCTGGCTAGCAGTGGAAACGTGGACTGCCCTGCG |
| NANOG  | F:TCTTCCTTCCTCCATGGATCT                |
|        | R:AGGACTGGATGTTCTGGGTCT                |
| OCT3/4 | F:AGTGAGCAACCTGGAGA                    |
|        | R:TTTTTCGTCGCTTGGAGACT                 |
| c-MYC  | F:GGGGCTTTATCTAACTCGCTGTAG             |
|        | R:AGTCGTAGTCGAGGTCATAGTTCC             |
| DAX1   | F:GAGTCTGAACATCAGTACCAAGGA ,           |
|        | R:GCTCTTTATTCTTCCCTCATGGTG             |
| FOXO3  | F:GTCG TTCAGCATCGAGAACA                |
|        | R:AAATTGGGGAGAGGCAGAGT                 |
| KLF4   | F:AGATGTCTAAGGAGCTGGTTGAGT             |
|        | R:GTACGCTCTGTGGATTCCTTTAGT             |

**Table S3**

| Gene | Primer |
|------|--------|
|------|--------|

|        |                                             |
|--------|---------------------------------------------|
| AKT1   | F:AGGTGACACTATAGAATAGAGGAGATGGACTTCCGGTC    |
|        | R:GTACGACTCACTATAGGGAAGGATCTTCATGGCGTAGTAGC |
| ERK1/2 | F:AGGTGACACTATAGAATAGGAGCAGTATTACGACCCGA    |
|        | R:GTACGACTCACTATAGGGAGATGTCTGAGCACGTCCAGT   |
| JNK    | F:AGGTGACACTATAGAATACAGAAGCTCCACCACCAAAGAT  |
|        | R:GTACGACTCACTATAGGGAGCCATTGATCACTGCTGCAC   |
| p38    | F:AGGTGACACTATAGAATATTCAGTCTTTGACTCAGATGCC  |
|        | R:GTACGACTCACTATAGGGAGTCAGGCTTTTCCACTCATCT  |
| p53    | F:AGGTGACACTATAGAATAGGGGAGCAGGGCTCA ,       |
|        | R:GTACGACTCACTATAGGGAAAAATGGCAGGGGAGGG      |
| p21    | F:AGGTGACACTATAGAATATTAGCAGCGGAACAAGGAGT    |
|        | R:GTACGACTCACTATAGGGAAGCCGAGAGAAAAACAGTCCA  |
| PARP1  | F:AGGTGACACTATAGAATATATCGAGTCGAGTACGCCAA    |
|        | R:GTACGACTCACTATAGGGAGTGTGGGACTTTTCCATCAAA  |
| NF-kB  | F:AGGTGACACTATAGAATAGCGGGCGTCTAAAATTCTG     |
|        | R:GTACGACTCACTATAGGGATTCCACGATCACCAGGTAGG   |
